# Supplementary material for: Increased Temporal Dynamics of Intrinsic Brain Activity in Sensory and Perceptual Network of Schizophrenia
Source: PubMed Central journal article supplement (PMC6639429; doi:10.3389/fpsyt.2019.00484), 2019-07-12
Supplement: DataSheet_1.pdf [file DataSheet_1.pdf]

## Supplementary material

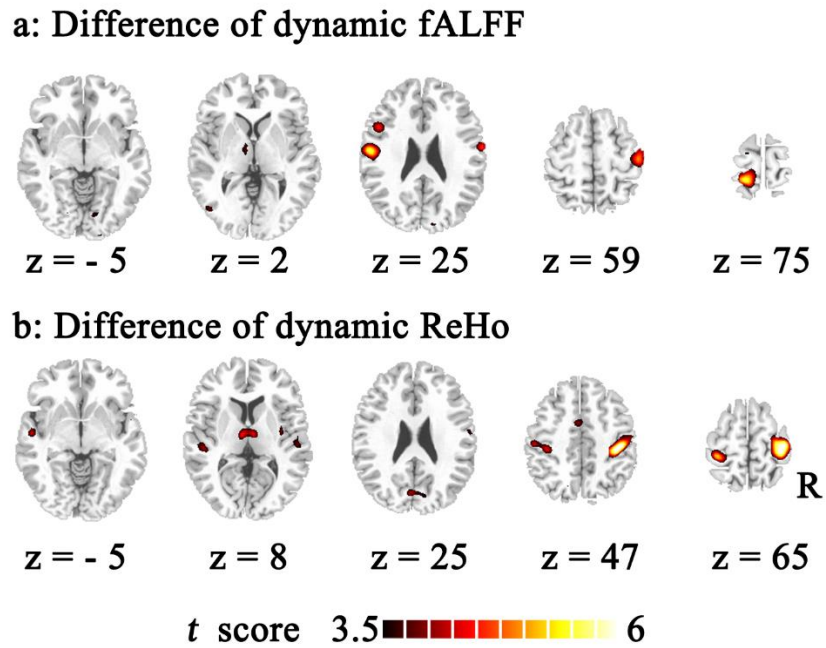

**SFigure 1:** Group difference of temporal variability of the dynamic fALFF and ReHo. Temporal variability of the dynamic fALFF and ReHo between schizophrenic and healthy subjects were identified using two-sample  $t$  tests. The significance level was set  $P_{FDR} < 0.05$ . (a) the increased dynamic fALFF in schizophrenic subjects compared to healthy controls. (b) the enhanced dynamic ReHo in patients with schizophrenia.

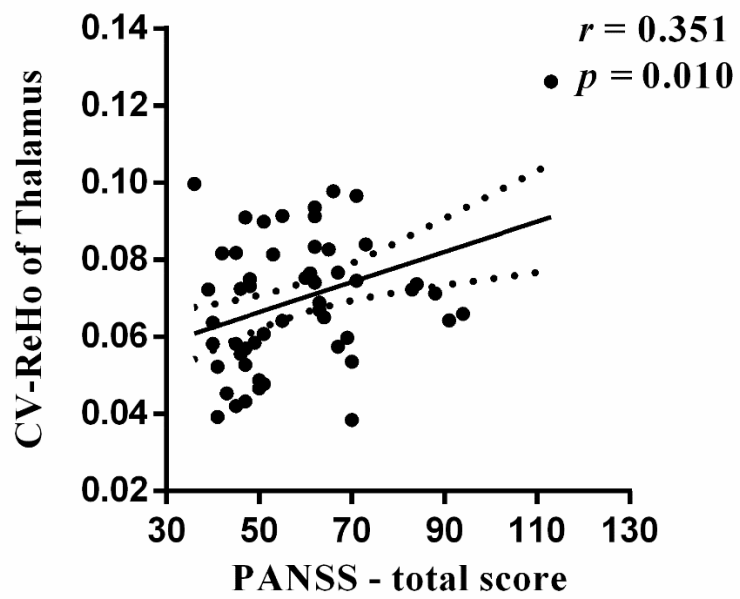

**Figure 2:** The PANSS-total score was positively related with CV score of thalamus region in schizophrenic subjects.
